# Supplementary material for: Superoxide dismutases: Dual roles in controlling ROS damage and regulating ROS signaling
Source: PubMed Central journal article supplement — J Cell Biol. 2018 Jun 4;217(6):1915–28. doi: 10.1083/jcb.201708007 (PMC5987716; doi:10.1083/jcb.201708007), 2018-06-04
Supplement: JCB_201708007_sm.pdf [file JCB_201708007_sm.pdf]

## Supplemental material

Wang et al., <https://doi.org/10.1083/jcb.201708007>

Table S1. Nomenclature and characteristics of SOD enzymes across various species

| Species                         | Isoforms     |            | Metal cofactor  | Location                                                               | References                                    |
|---------------------------------|--------------|------------|-----------------|------------------------------------------------------------------------|-----------------------------------------------|
|                                 | Gene         | Protein    |                 |                                                                        |                                               |
| <i>Escherichia coli</i>         | <i>sodA</i>  | SodA       | Manganese       | Cytoplasm                                                              | (Keele et al., 1970)                          |
|                                 | <i>sodB</i>  | SodB       | Iron            | Cytoplasm                                                              | (Yost and Fridovich, 1973)                    |
|                                 | <i>sodC</i>  | SodC       | Copper and zinc | Periplasmic space                                                      | (Imlay and Imlay, 1996)                       |
| <i>Saccharomyces cerevisiae</i> | <i>SOD1</i>  | SOD1       | Copper and zinc | Cytoplasm and mitochondrial intermembrane space                        | (Sturtz et al., 2001)                         |
|                                 | <i>SOD2</i>  | SOD2       | Manganese       | Mitochondrial matrix                                                   | (Ravindranath and Fridovich, 1975)            |
| <i>C. elegans</i>               | <i>sod-1</i> | SOD-1      | Copper and zinc | Cytoplasm                                                              | (Larsen, 1993)                                |
|                                 | <i>sod-2</i> | SOD-2      | Manganese       | Mitochondrial matrix                                                   | (Hunter et al., 1997)                         |
|                                 | <i>sod-3</i> | SOD-3      | Manganese       | Mitochondrial matrix                                                   | (Hunter et al., 1997)                         |
|                                 | <i>sod-4</i> | SOD-4      | Copper and zinc | Extracellular space and plasma membrane                                | (Fujii et al., 1998)                          |
|                                 | <i>sod-5</i> | SOD-5      | Copper and zinc | Cytoplasm                                                              | (Jensen and Culotta, 2005)                    |
| <i>Drosophila</i>               | <i>Sod1</i>  | SOD1       | Copper and zinc | Cytoplasm and mitochondrial intermembrane space                        | (Campbell et al., 1986)                       |
|                                 | <i>Sod2</i>  | SOD2       | Manganese       | Mitochondrial matrix                                                   | (Duttaroy et al., 1997)                       |
|                                 | <i>Sod3</i>  | SOD3       | Copper and zinc | Extracellular space and plasma membrane                                | (Jung et al., 2011; Blackney et al., 2014)    |
| Rodent                          | <i>Sod1</i>  | SOD1       | Copper and zinc | Cytoplasm, mitochondrial intermembrane space, nucleus, and peroxisomes | (Chang et al., 1988)                          |
|                                 | <i>Sod2</i>  | SOD2       | Manganese       | Mitochondrial matrix                                                   | (Jones et al., 1995)                          |
|                                 | <i>Sod3</i>  | SOD3/ecSOD | Copper and zinc | Extracellular matrix and endothelial surface                           | (Folz et al., 1997)                           |
| Human                           | <i>SOD1</i>  | SOD1       | Copper and zinc | Cytoplasm and mitochondrial intermembrane space, and nucleus           | (Levanon et al., 1985)                        |
|                                 | <i>SOD2</i>  | SOD2       | manganese       | mitochondrial matrix                                                   | (Wan et al., 1994)                            |
|                                 | <i>SOD3</i>  | SOD3/ecSOD | copper and zinc | extracellular matrix and endothelial surface                           | (Strålin et al., 1995; Antonyuk et al., 2009) |

Table S2 is a separate PDF showing Sod gene knockout mouse models and their phenotypes.

## References

- Antonyuk, S.V., R.W. Strange, S.L. Marklund, and S.S. Hasnain. 2009. The structure of human extracellular copper-zinc superoxide dismutase at 1.7 Å resolution: insights into heparin and collagen binding. *J. Mol. Biol.* 388:310–326. <https://doi.org/10.1016/j.jmb.2009.03.026>
- Blackney, M.J., R. Cox, D. Shepherd, and J.D. Parker. 2014. Cloning and expression analysis of *Drosophila* extracellular Cu Zn superoxide dismutase. *Biosci. Rep.* 34:e00164. <https://doi.org/10.1042/BSR20140133>
- Campbell, S.D., A.J. Hilliker, and J.P. Phillips. 1986. Cytogenetic analysis of the cSOD microregion in *Drosophila melanogaster*. *Genetics.* 112:205–215.
- Chang, L.Y., J.W. Slot, H.J. Geuze, and J.D. Crapo. 1988. Molecular immunocytochemistry of the CuZn superoxide dismutase in rat hepatocytes. *J. Cell Biol.* 107:2169–2179. <https://doi.org/10.1083/jcb.107.6.2169>
- Duttaroy, A., T. Parkes, P. Emtage, K. Kirby, G.L. Boulianne, X. Wang, A.J. Hilliker, and J.P. Phillips. 1997. The manganese superoxide dismutase gene of *Drosophila*: structure, expression, and evidence for regulation by MAP kinase. *DNA Cell Biol.* 16:391–399. <https://doi.org/10.1089/dna.1997.16.391>
- Folz, R.J., J. Guan, M.F. Seldin, T.D. Oury, J.J. Enghild, and J.D. Crapo. 1997. Mouse extracellular superoxide dismutase: primary structure, tissue-specific gene expression, chromosomal localization, and lung in situ hybridization. *Am. J. Respir. Cell Mol. Biol.* 17:393–403. <https://doi.org/10.1165/ajrcmb.17.4.2826>
- Fujii, M., N. Ishii, A. Joguchi, K. Yasuda, and D. Ayusawa. 1998. A novel superoxide dismutase gene encoding membrane-bound and extracellular isoforms by alternative splicing in *Caenorhabditis elegans*. *DNA Res.* 5:25–30. <https://doi.org/10.1093/dnares/5.1.25>
- Hunter, T., W.H. Bannister, and G.J. Hunter. 1997. Cloning, expression, and characterization of two manganese superoxide dismutases from *Caenorhabditis elegans*. *J. Biol. Chem.* 272:28652–28659. <https://doi.org/10.1074/jbc.272.45.28652>
- Imlay, K.R., and J.A. Imlay. 1996. Cloning and analysis of *sodC*, encoding the copper-zinc superoxide dismutase of *Escherichia coli*. *J. Bacteriol.* 178:2564–2571. <https://doi.org/10.1128/jb.178.9.2564-2571.1996>

- Jensen, L.T., and V.C. Culotta. 2005. Activation of CuZn superoxide dismutases from *Caenorhabditis elegans* does not require the copper chaperone CCS. *J. Biol. Chem.* 280:41373–41379. <https://doi.org/10.1074/jbc.M509142200>
- Jones, P.L., G. Kucera, H. Gordon, and J.M. Boss. 1995. Cloning and characterization of the murine manganous superoxide dismutase-encoding gene. *Gene*. 153:155–161. [https://doi.org/10.1016/0378-1119\(94\)00666-G](https://doi.org/10.1016/0378-1119(94)00666-G)
- Jung, I., T.Y. Kim, and J. Kim-Ha. 2011. Identification of *Drosophila* SOD3 and its protective role against phototoxic damage to cells. *FEBS Lett.* 585:1973–1978. <https://doi.org/10.1016/j.febslet.2011.05.033>
- Keele, B.B. Jr., J.M. McCord, and I. Fridovich. 1970. Superoxide dismutase from *Escherichia coli* B. A new manganese-containing enzyme. *J. Biol. Chem.* 245:6176–6181.4921969
- Larsen, P.L. 1993. Aging and resistance to oxidative damage in *Caenorhabditis elegans*. *Proc. Natl. Acad. Sci. USA.* 90:8905–8909. <https://doi.org/10.1073/pnas.90.19.8905>
- Levanon, D., J. Lieman-Hurwitz, N. Dafni, M. Wigderson, L. Sherman, Y. Bernstein, Z. Laver-Rudich, E. Danciger, O. Stein, and Y. Groner. 1985. Architecture and anatomy of the chromosomal locus in human chromosome 21 encoding the Cu/Zn superoxide dismutase. *EMBO J.* 4:77–84.
- Ravindranath, S.D., and I. Fridovich. 1975. Isolation and characterization of a manganese-containing superoxide dismutase from yeast. *J. Biol. Chem.* 250:6107–6112.238997
- Strålin, P., K. Karlsson, B.O. Johansson, and S.L. Marklund. 1995. The interstitium of the human arterial wall contains very large amounts of extracellular superoxide dismutase. *Arterioscler. Thromb. Vasc. Biol.* 15:2032–2036. <https://doi.org/10.1161/01.ATV.15.11.2032>
- Sturtz, L.A., K. Diekert, L.T. Jensen, R. Lill, and V.C. Culotta. 2001. A fraction of yeast Cu,Zn-superoxide dismutase and its metallochaperone, CCS, localize to the intermembrane space of mitochondria. A physiological role for SOD1 in guarding against mitochondrial oxidative damage. *J. Biol. Chem.* 276:38084–38089.11500508
- Wan, X.S., M.N. Devalaraja, and D.K. St Clair. 1994. Molecular structure and organization of the human manganese superoxide dismutase gene. *DNA Cell Biol.* 13:1127–1136. <https://doi.org/10.1089/dna.1994.13.1127>
- Yost, F.J. Jr., and I. Fridovich. 1973. An iron-containing superoxide dismutase from *Escherichia coli*. *J. Biol. Chem.* 248:4905–4908.4352182
